# Supplementary material
Source: publisher figshare collection journal article supplement (https://acs.figshare.com/ndownloader/files/20046581)
Supplement: Supplementary file 1 [file 20046581]

## ***Supporting Information***

***for***

### **Gold Triangular Nanoplates Based Single-Particle Dark-Field Microscopy Assay of Pyrophosphate**

Xiao Ying Gu,<sup>†</sup> Jia Jun Liu,<sup>‡</sup> Peng Fei Gao,<sup>\*,‡</sup> Yuan Fang Li,<sup>†</sup> Cheng Zhi Huang<sup>\*,†,‡</sup>

<sup>†</sup> *Key Laboratory of Luminescent and Real-Time Analytical Chemistry (Southwest University), Ministry of Education, College of Chemistry and Chemical Engineering, Southwest University, Chongqing 400715, China. E-mail: chengzhi@swu.edu.cn, Tel: (+86) 23 68254659, Fax: (+86) 23 68367257.*

<sup>‡</sup> *Chongqing Key Laboratory of Biomedical Analysis (Southwest University), Chongqing Science & Technology Commission, College of Pharmaceutical Science, Southwest University, Chongqing 400715, China. E-mail: shandonggaopengfei@163.com, Tel: (+86) 23 68254059, Fax: (+86) 23 68367257.*

### ***Table of Contents:***

**Figure S1.** The histogram of edge length of AuNPLs.

**Figure S2.** The co-localization images of the DFM and SEM.

**Figure S3.** Effect of temperature on the AuNPLs etching.

**Figure S4.** Effect of surfactant type on the AuNPLs etching.

**Figure S5.** Effect of pH on the AuNPLs etching.

**Figure S6.** The etching process of an individual AuNR.

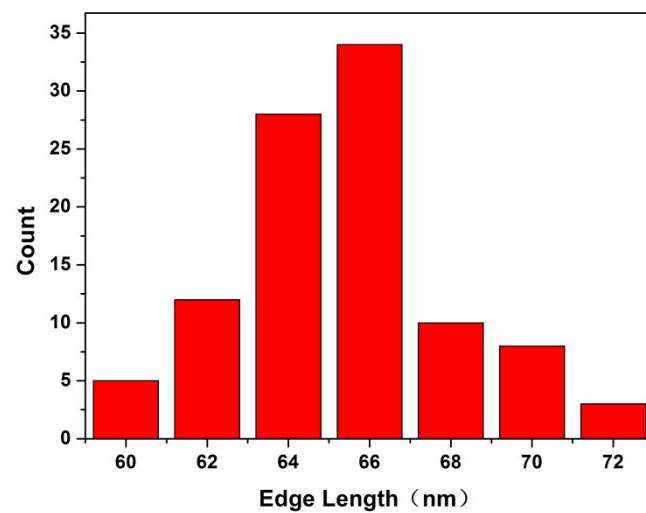

**Figure S1.** The histogram of edge length of AuNPLs by counting 100 nanoparticles.

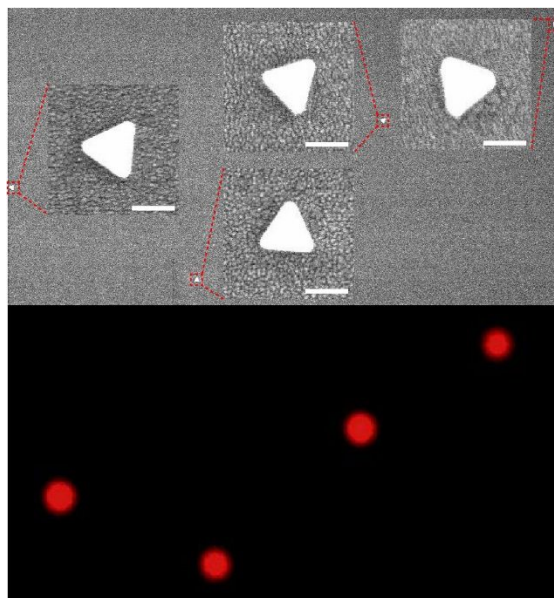

**Figure S2.** The co-localization images of the DFM and SEM (scale bar: 60nm).

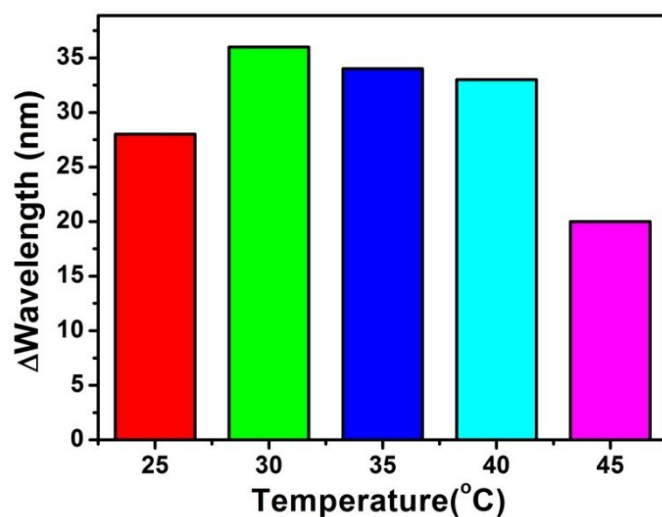

**Figure S3.** Effect of temperature on the AuNPLs etching. The result showed that when the temperature reached 30 °C, the redshift of wavelength is largest.

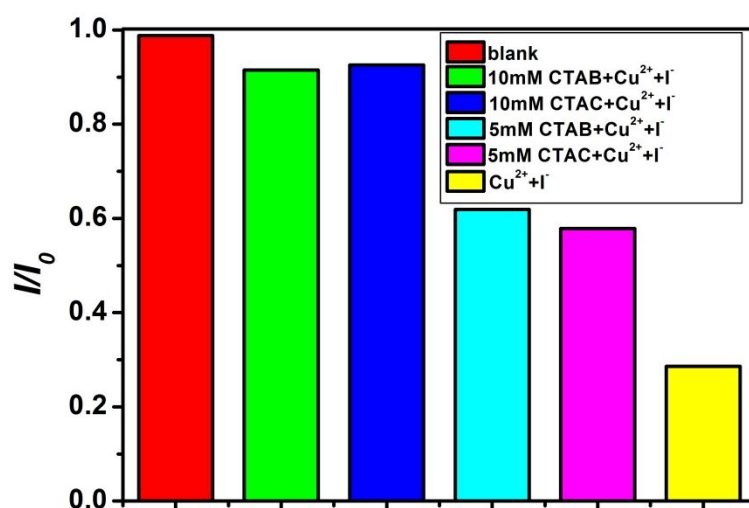

**Figure S4.** Effect of surfactant type on the AuNPLs etching. CTAC and CTAB was investigated to show that the increase of surfactant concentration resulted in increased value of  $I/I_0$  ratio, indicating that CTAC and CTAB inhibited the AuNPLs etching.

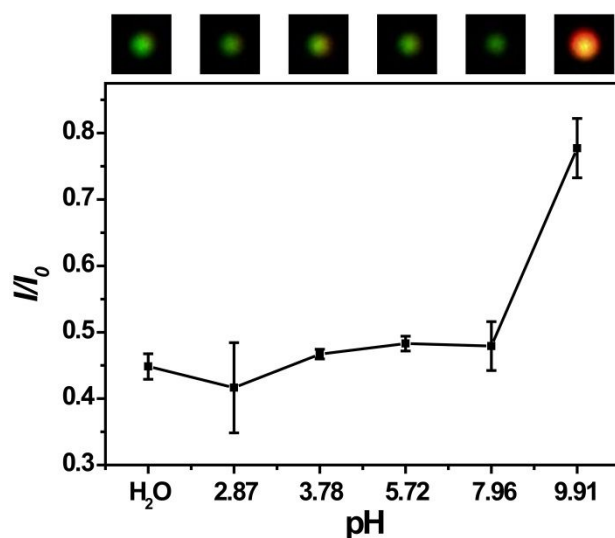

**Figure S5.** Effect of pH on the AuNPLs etching. The ratio of scattering intensities ( $I/I_0$ ) and DFM images was not sensitive to the pH under the acidic conditions. However, in the basic medium, the ratio increased greatly and the color of the nanoplates was red under DFM, indicating the inhibition of the etching reaction, which is attributed to the formation of copper hydroxides under basic conditions.

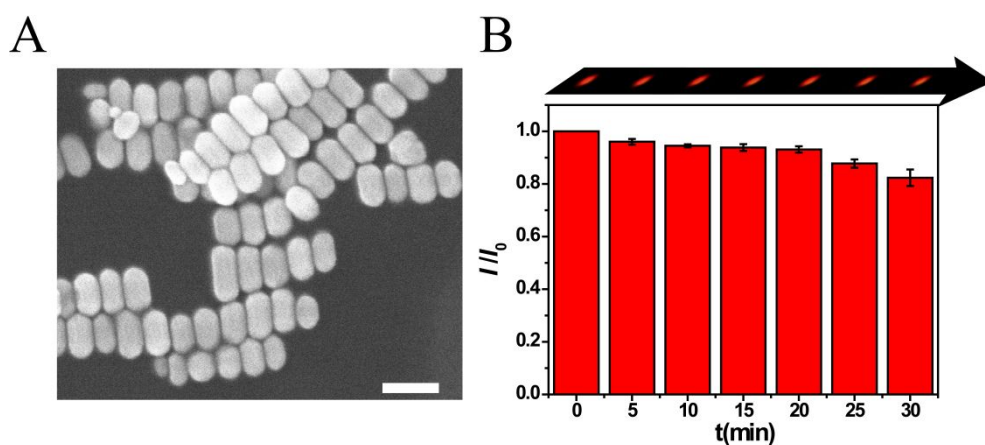

**Figure S6.** The etching process of an individual AuNR. (A) SEM images of AuNRs. (B) The representative time-dependent single-particle ratio of intensity, shown above is the DFM images of an individual AuNR over time.
